# Supplementary material for: A comparative thermodynamic study of the formation of scandium complexes with DTPA and DOTA
Source: Royal Society of Chemistry journal article supplement (doi:10.1039/c5ra16736a), 2015-01-01
Supplement: c5ra16736a1.pdf [file c5ra16736a1.pdf]

Supplementary materials

CE-ICPMS – Electrophoretic mobility as a function of [DTPA] at various pH, I=0.1 M NaCl; T = 25 °C, V = 5 kV, L = 70 cm, internal diameter 100 μM

|                       | pH = 1.35 ± 0.05                                     | pH = 1.85 ± 0.05                                     | pH = 2.11 ± 0.05                                     | pH = 2.94 ± 0.13      |                                                      |
|-----------------------|------------------------------------------------------|------------------------------------------------------|------------------------------------------------------|-----------------------|------------------------------------------------------|
| [DTPA] (M)            | μ (cm <sup>2</sup> V <sup>-1</sup> s <sup>-1</sup> ) | μ (cm <sup>2</sup> V <sup>-1</sup> s <sup>-1</sup> ) | μ (cm <sup>2</sup> V <sup>-1</sup> s <sup>-1</sup> ) | [DTPA] (M)            | μ (cm <sup>2</sup> V <sup>-1</sup> s <sup>-1</sup> ) |
| 1.11 10 <sup>-7</sup> | 2.332 10 <sup>-4</sup>                               | 4.620 10 <sup>-4</sup>                               | 1.840 10 <sup>-4</sup>                               | 1.11 10 <sup>-9</sup> | 7.22 10 <sup>-5</sup>                                |
|                       | 2.320 10 <sup>-4</sup>                               |                                                      |                                                      |                       |                                                      |
|                       | 2.328 10 <sup>-4</sup>                               |                                                      |                                                      |                       |                                                      |
| 2.38 10 <sup>-7</sup> | 2.207 10 <sup>-4</sup>                               | 5.550 10 <sup>-4</sup>                               | 1.870 10 <sup>-4</sup>                               | 1.11 10 <sup>-8</sup> | 9.44 10 <sup>-5</sup>                                |
|                       | 2.330 10 <sup>-4</sup>                               |                                                      |                                                      |                       |                                                      |
|                       | 2.015 10 <sup>-4</sup>                               |                                                      |                                                      |                       |                                                      |
| 5.14 10 <sup>-7</sup> | 2.166 10 <sup>-4</sup>                               | 5.200 10 <sup>-4</sup>                               | 7.70 10 <sup>-5</sup>                                | 2.15 10 <sup>-8</sup> | 5.81 10 <sup>-5</sup>                                |
|                       | 2.140 10 <sup>-4</sup>                               |                                                      |                                                      |                       |                                                      |
|                       | 2.030 10 <sup>-4</sup>                               |                                                      |                                                      |                       |                                                      |
| 1.11 10 <sup>-6</sup> | 2.170 10 <sup>-4</sup>                               | 5.630 10 <sup>-4</sup>                               | 1.970 10 <sup>-4</sup>                               | 2.38 10 <sup>-7</sup> | 6.14 10 <sup>-5</sup>                                |
|                       | 2.274 10 <sup>-4</sup>                               |                                                      |                                                      |                       |                                                      |
| 2.32 10 <sup>-6</sup> | 1.520 10 <sup>-4</sup>                               | 3.570 10 <sup>-4</sup>                               | -1.018 10 <sup>-4</sup>                              | 5.14 10 <sup>-7</sup> | 5.32 10 <sup>-5</sup>                                |
|                       | 2.079 10 <sup>-4</sup>                               |                                                      |                                                      |                       |                                                      |
|                       | 1.740 10 <sup>-4</sup>                               |                                                      |                                                      |                       |                                                      |
| 4.88 10 <sup>-6</sup> | 1.690 10 <sup>-4</sup>                               | 1.10 10 <sup>-5</sup>                                | -1.580 10 <sup>-4</sup>                              | 1.69 10 <sup>-6</sup> | -2.48 10 <sup>-5</sup>                               |
|                       | 1.591 10 <sup>-4</sup>                               |                                                      |                                                      |                       |                                                      |
| 1.05 10 <sup>-5</sup> | 9.25 10 <sup>-5</sup>                                | -1.67 10 <sup>-5</sup>                               | -4.490 10 <sup>-4</sup>                              | 1.60 10 <sup>-5</sup> | -2.510 10 <sup>-4</sup>                              |
|                       | 8.81 10 <sup>-5</sup>                                |                                                      |                                                      |                       |                                                      |
|                       | 4.85 10 <sup>-5</sup>                                |                                                      |                                                      |                       |                                                      |
| 2.26 10 <sup>-5</sup> | -2.6 10 <sup>-6</sup>                                |                                                      | -4.350 10 <sup>-4</sup>                              | 10 <sup>-3</sup>      | -2.840 10 <sup>-4</sup>                              |
|                       | 8.2 10 <sup>-5</sup>                                 |                                                      |                                                      |                       |                                                      |
| 4.88 10 <sup>-5</sup> | -2.76 10 <sup>-5</sup>                               | -6.13 10 <sup>-5</sup>                               | -3.650 10 <sup>-4</sup>                              |                       |                                                      |
| 10 <sup>-4</sup>      | -5.96 10 <sup>-5</sup>                               | -6.57 10 <sup>-5</sup>                               | -3.250 10 <sup>-4</sup>                              |                       |                                                      |
|                       | -2.89 10 <sup>-5</sup>                               |                                                      |                                                      |                       |                                                      |
|                       | -2.45 10 <sup>-5</sup>                               |                                                      |                                                      |                       |                                                      |
| 2.15 10 <sup>-4</sup> |                                                      |                                                      | -2.930 10 <sup>-4</sup>                              |                       |                                                      |
| 4.64 10 <sup>-4</sup> | -5.40 10 <sup>-5</sup>                               | -1.870 10 <sup>-4</sup>                              | -3.170 10 <sup>-4</sup>                              |                       |                                                      |
| 10 <sup>-3</sup>      | -8.66 10 <sup>-5</sup>                               | -2.290 10 <sup>-4</sup>                              | -4.150 10 <sup>-4</sup>                              |                       |                                                      |
|                       | -1.215 10 <sup>-4</sup>                              |                                                      |                                                      |                       |                                                      |
| 2.15 10 <sup>-3</sup> | -9.95 10 <sup>-5</sup>                               | -2.230 10 <sup>-4</sup>                              | -4.700 10 <sup>-4</sup>                              |                       |                                                      |
| 4.64 10 <sup>-3</sup> | -1.033 10 <sup>-4</sup>                              |                                                      | -4.120 10 <sup>-4</sup>                              |                       |                                                      |
|                       | -1.070 10 <sup>-4</sup>                              |                                                      |                                                      |                       |                                                      |
| 10 <sup>-2</sup>      | -1.221 10 <sup>-4</sup>                              |                                                      | -3.400 10 <sup>-4</sup>                              |                       |                                                      |
|                       | -1.085 10 <sup>-4</sup>                              |                                                      |                                                      |                       |                                                      |
